# Supplementary material for: The effectiveness of health care provider physical activity recommendations in cancer survivors: a systematic review and meta-analysis protocol
Source: Springer Nature journal article supplement (doi:10.1186/s13643-017-0453-3), 2017-03-27
Supplement: MOESM1 [file 12180070]

### Additional file 1: PRISMA-P 2015 checklist

This checklist has been adapted for use with systematic review protocol submissions to BioMed Central journals from Table 3 in Moher D, et al. Preferred reporting items for systematic review and meta-analysis protocols (PRISMA-P) 2015 statement. *Systematic Reviews*. 2015;4:1.

An Editorial from the Editors-in-Chief of *Systematic Reviews* details why this checklist was adapted - Moher D, Stewart L, Shekelle P. Implementing PRISMA-P: recommendations for prospective authors. *Systematic Reviews*. 2016;5:15.

| Section/topic                     | #  | Checklist item                                                                                                                                | Information reported                |                                     | Page number(s), section, line number(s)*                                                                                                           |
|-----------------------------------|----|-----------------------------------------------------------------------------------------------------------------------------------------------|-------------------------------------|-------------------------------------|----------------------------------------------------------------------------------------------------------------------------------------------------|
|                                   |    |                                                                                                                                               | Yes                                 | No                                  |                                                                                                                                                    |
| <b>ADMINISTRATIVE INFORMATION</b> |    |                                                                                                                                               |                                     |                                     |                                                                                                                                                    |
| <b>Title</b>                      |    |                                                                                                                                               |                                     |                                     |                                                                                                                                                    |
| Identification                    | 1a | Identify the report as a protocol of a systematic review                                                                                      | <input checked="" type="checkbox"/> | <input type="checkbox"/>            | Page 1, title section, lines 1-5<br>Page 2, methods section, lines 51-58                                                                           |
| Update                            | 1b | If the protocol is for an update of a previous systematic review, identify as such                                                            | <input type="checkbox"/>            | <input checked="" type="checkbox"/> | This protocol is not an update of a previous systematic review                                                                                     |
| Registration                      | 2  | If registered, provide the name of the registry (e.g., PROSPERO) and registration number in the Abstract                                      | <input checked="" type="checkbox"/> | <input type="checkbox"/>            | Once this protocol has undergone peer review and has been accepted for publication, the published review protocol will be registered with PROSPERO |
| <b>Authors</b>                    |    |                                                                                                                                               |                                     |                                     |                                                                                                                                                    |
| Contact                           | 3a | Provide name, institutional affiliation, and e-mail address of all protocol authors; provide physical mailing address of corresponding author | <input checked="" type="checkbox"/> | <input type="checkbox"/>            | Page 1, author section, lines 6-7<br>Page 1, brief author details section, lines 34-39<br>Page 5, author details section, lines 52-63              |

| Section/topic          | #  | Checklist item                                                                                                                                                                                                            | Information reported                |                                     | Page number(s), section, line number(s)*                                                             |
|------------------------|----|---------------------------------------------------------------------------------------------------------------------------------------------------------------------------------------------------------------------------|-------------------------------------|-------------------------------------|------------------------------------------------------------------------------------------------------|
|                        |    |                                                                                                                                                                                                                           | Yes                                 | No                                  |                                                                                                      |
| Contributions          | 3b | Describe contributions of protocol authors and identify the guarantor of the review                                                                                                                                       | <input checked="" type="checkbox"/> | <input type="checkbox"/>            | Page 5, authors' contributions section, lines 34-37                                                  |
| Amendments             | 4  | If the protocol represents an amendment of a previously completed or published protocol, identify as such and list changes; otherwise, state plan for documenting important protocol amendments                           | <input type="checkbox"/>            | <input checked="" type="checkbox"/> | This protocol does not represent an amendment of a previously completed or published protocol        |
| <b>Support</b>         |    |                                                                                                                                                                                                                           |                                     |                                     |                                                                                                      |
| Sources                | 5a | Indicate sources of financial or other support for the review                                                                                                                                                             | <input checked="" type="checkbox"/> | <input type="checkbox"/>            | Page 5, funding section, lines 33-36                                                                 |
| Sponsor                | 5b | Provide name for the review funder and/or sponsor                                                                                                                                                                         | <input checked="" type="checkbox"/> | <input type="checkbox"/>            | Page 5, funding section, lines 33-36                                                                 |
| Role of sponsor/funder | 5c | Describe roles of funder(s), sponsor(s), and/or institution(s), if any, in developing the protocol                                                                                                                        | <input checked="" type="checkbox"/> | <input type="checkbox"/>            | Page 5, funding section, lines 33-36                                                                 |
| <b>INTRODUCTION</b>    |    |                                                                                                                                                                                                                           |                                     |                                     |                                                                                                      |
| Rationale              | 6  | Describe the rationale for the review in the context of what is already known                                                                                                                                             | <input checked="" type="checkbox"/> | <input type="checkbox"/>            | Page 1, background section, lines 27-51<br>Page 2, background section, lines 1-50                    |
| Objectives             | 7  | Provide an explicit statement of the question(s) the review will address with reference to participants, interventions, comparators, and outcomes (PICO)                                                                  | <input checked="" type="checkbox"/> | <input type="checkbox"/>            | Page 2, background section, lines 46                                                                 |
| <b>METHODS</b>         |    |                                                                                                                                                                                                                           |                                     |                                     |                                                                                                      |
| Eligibility criteria   | 8  | Specify the study characteristics (e.g., PICO, study design, setting, time frame) and report characteristics (e.g., years considered, language, publication status) to be used as criteria for eligibility for the review | <input checked="" type="checkbox"/> | <input type="checkbox"/>            | Page 2, inclusion/exclusion section, lines 59-103<br>Page 3, inclusion/exclusion section, lines 1-22 |
| Information sources    | 9  | Describe all intended information sources (e.g., electronic databases, contact with study authors, trial registers, or other grey literature sources) with planned dates of coverage                                      | <input checked="" type="checkbox"/> | <input type="checkbox"/>            | Page 3, data sources and search strategy section, lines 23-58                                        |

| Section/topic                      | #   | Checklist item                                                                                                                                                                                                       | Information reported                |                          | Page number(s), section, line number(s)*                                                     |
|------------------------------------|-----|----------------------------------------------------------------------------------------------------------------------------------------------------------------------------------------------------------------------|-------------------------------------|--------------------------|----------------------------------------------------------------------------------------------|
|                                    |     |                                                                                                                                                                                                                      | Yes                                 | No                       |                                                                                              |
| Search strategy                    | 10  | Present draft of search strategy to be used for at least one electronic database, including planned limits, such that it could be repeated                                                                           | <input checked="" type="checkbox"/> | <input type="checkbox"/> | Page 3, data sources and search strategy section, line 49<br>See Additional file 2           |
| <b>STUDY RECORDS</b>               |     |                                                                                                                                                                                                                      |                                     |                          |                                                                                              |
| Data management                    | 11a | Describe the mechanism(s) that will be used to manage records and data throughout the review                                                                                                                         | <input checked="" type="checkbox"/> | <input type="checkbox"/> | Page 3, study selection section, lines 60-63                                                 |
| Selection process                  | 11b | State the process that will be used for selecting studies (e.g., two independent reviewers) through each phase of the review (i.e., screening, eligibility, and inclusion in meta-analysis)                          | <input checked="" type="checkbox"/> | <input type="checkbox"/> | Page 3, study selection section, lines 59-92                                                 |
| Data collection process            | 11c | Describe planned method of extracting data from reports (e.g., piloting forms, done independently, in duplicate), any processes for obtaining and confirming data from investigators                                 | <input checked="" type="checkbox"/> | <input type="checkbox"/> | Page 3, data extraction section, lines 93-103<br>Page 4, data extraction section, lines 1-10 |
| Data items                         | 12  | List and define all variables for which data will be sought (e.g., PICO items, funding sources), any pre-planned data assumptions and simplifications                                                                | <input checked="" type="checkbox"/> | <input type="checkbox"/> | Page 3, data extraction section, lines 101-103<br>Page 4, data extraction section, lines 1-6 |
| Outcomes and prioritization        | 13  | List and define all outcomes for which data will be sought, including prioritization of main and additional outcomes, with rationale                                                                                 | <input checked="" type="checkbox"/> | <input type="checkbox"/> | Page 3, types of outcome measures section, lines 7-13                                        |
| Risk of bias in individual studies | 14  | Describe anticipated methods for assessing risk of bias of individual studies, including whether this will be done at the outcome or study level, or both; state how this information will be used in data synthesis | <input checked="" type="checkbox"/> | <input type="checkbox"/> | Page 4, assessment of risk of bias of the included studies section, lines 11-42              |

| Section/topic                            | #   | Checklist item                                                                                                                                                                                                                              | Information reported                |                                     | Page number(s), section, line number(s)*                                                                                                |
|------------------------------------------|-----|---------------------------------------------------------------------------------------------------------------------------------------------------------------------------------------------------------------------------------------------|-------------------------------------|-------------------------------------|-----------------------------------------------------------------------------------------------------------------------------------------|
|                                          |     |                                                                                                                                                                                                                                             | Yes                                 | Not                                 |                                                                                                                                         |
| <b>DATA</b>                              |     |                                                                                                                                                                                                                                             |                                     |                                     |                                                                                                                                         |
| <b>Synthesis</b>                         | 15a | Describe criteria under which study data will be quantitatively synthesized                                                                                                                                                                 | <input checked="" type="checkbox"/> | <input type="checkbox"/>            | Page 4, statistical analysis section, lines 55-85                                                                                       |
|                                          | 15b | If data are appropriate for quantitative synthesis, describe planned summary measures, methods of handling data, and methods of combining data from studies, including any planned exploration of consistency (e.g., $I^2$ , Kendall's tau) | <input checked="" type="checkbox"/> | <input type="checkbox"/>            | Page 4, statistical analysis section, lines 55-85                                                                                       |
|                                          | 15c | Describe any proposed additional analyses (e.g., sensitivity or subgroup analyses, meta-regression)                                                                                                                                         | <input checked="" type="checkbox"/> | <input type="checkbox"/>            | Page 4, statistical analysis section, lines 55-85                                                                                       |
|                                          | 15d | If quantitative synthesis is not appropriate, describe the type of summary planned                                                                                                                                                          | <input checked="" type="checkbox"/> | <input type="checkbox"/>            | Page 2, types of studies section, 100-103<br>Page 3, types of studies section, 1-6<br>Page 4, statistical analysis section, lines 55-85 |
| <b>Meta-bias(es)</b>                     | 16  | Specify any planned assessment of meta-bias(es) (e.g., publication bias across studies, selective reporting within studies)                                                                                                                 | <input type="checkbox"/>            | <input checked="" type="checkbox"/> | This has not been specified                                                                                                             |
| <b>Confidence in cumulative evidence</b> | 17  | Describe how the strength of the body of evidence will be assessed (e.g., GRADE)                                                                                                                                                            | <input type="checkbox"/>            | <input checked="" type="checkbox"/> | This has not been described                                                                                                             |

\* Line numbers re-start on the first line of every page and do not include spaces.
