# Supplementary material for: The effectiveness of health care provider physical activity recommendations in cancer survivors: a systematic review and meta-analysis protocol
Source: Springer Nature journal article supplement (doi:10.1186/s13643-017-0453-3), 2017-03-27
Supplement: MOESM2 [file 12180070]

## Additional file 2: MEDLINE search strategy

1. exp exercise/
2. physical fitness/
3. motor activity/
4. exercis\*.tw,kw.
5. (physical\* adj2 (activ\* or train\* or exercis\* or fit\*4)).tw,kw.
6. (physical\* adj2 condition\*).tw,kw.
7. aerobic.tw,kw.
8. endurance\*.tw,kw.
9. (strength adj1 (exercis\* or train\*)).tw,kw.
10. flexibility.tw,kw.
11. (resistance adj1 (exercis\* or train\*)).tw,kw.
12. ((muscl\* or muscul\*) adj2 (exercis\* or train\*)).tw,kw.
13. stretching.tw,kw.
14. (circuit-based adj1 exercis\*).tw,kw.
15. ((cool-down or cooldown) adj1 exercis\*).tw,kw.
16. ((muscl\* adj1 stretch\*) or (motion adj1 therap\*)).tw,kw.
17. (plyometric adj1 exercis\*).tw,kw.
18. (swimming or swim).tw,kw.
19. swimming/ or running/ or walking/
20. (running or run).tw,kw.
21. (walking or walk).tw,kw.
22. ((warm-up or warmup) adj1 exercis\*).tw,kw.
23. or/1-22
24. counseling/
25. directive counseling/
26. motivational interviewing/
27. patient education as topic/
28. prescriptions/
29. (prescript\* or prescrib\*).tw,kw.
30. (advis\* or advice).tw,kw.
31. counsel\*.tw,kw.
32. (motivational adj1 interview\*).tw,kw.
33. (educat\* adj3 health\*).tw,kw.
34. (patient\* adj2 educat\*).tw,kw.
35. health promotion/
36. (health\* adj3 promot\*).tw,kw.
37. "referral and consultation"/
38. patient education handout/
39. or/24-38
40. 23 and 39
41. exp exercise therapy/
42. (exercis\* adj3 (promot\* or recommend\* or refer or refers or referred or referral\* or therap\* or counsel\* or prescrip\* or prescrib\* or rehab\* or coach\*)).tw,kw.

43. (physical\* adj2 (activ\* or train\* or fit\*4) adj3 (promot\* or recommend\* or refer or refers or referred or referral\* or therap\* or counsel\* or prescrip\* or prescrib\* or rehab\* or coach\*)).tw,kw.
44. (kinesiotherap\* or kinesitherap\* or kinesiatic\*).tw,kw.
45. or/40-44
46. exp neoplasms/
47. (cancer\* or tumo?r\* or oncolog\*).tw,kw.
48. (leuk?emia\* or carcinoma\* or adeno-carcinoma\* or neoplas\* or lymphoma\* or malignan\* or melanoma\* or metasta\* or sarcoma\* or adenoma\* or adenocarcinoma\* or blastoma\* or mesothelioma\*).tw,kw.
49. or/46-48
50. 45 and 49
51. randomized controlled trial.pt.
52. controlled clinical trial.pt.
53. randomi?ed.tw,kw.
54. placebo\*.tw,kw.
55. exp clinical trials as topic/
56. randomly.tw,kw.
57. trial.ti.
58. double-blind method/
59. single blind method/
60. ((singl\* or doubl\* or tripl\* or treb\*) adj (blind\*3 or mask\*3)).tw,kw.
61. placebos/
62. (nRCT\$1 or RCT or RCTs).tw,kw.
63. (nonrandom\* or non-random\* or quasi-random\* or quasi-experiment\* or (quasi adj1 experiment\*)).tw,kw.
64. historically controlled study/ or controlled before-after studies/ or case-control studies/
65. interrupted time series analysis/
66. (historically adj2 controlled).tw,kw.
67. (time adj1 series).tw,kw.
68. case-control\*.tw,kw.
69. (case adj1 control\*).tw,kw.
70. (controlled adj3 study).tw,kw.
71. or/51-70
72. 50 and 71
73. exp animals/ not humans.sh.
74. 72 not 73
75. exp infant/ not exp adults/
76. exp child/ not exp adults/
77. adolescent/ not exp adults/
78. or/75-77
79. 74 not 78
80. editorial.pt.
81. news.pt.
82. comment.pt.
83. interview.pt.

84. or/80-83  
85. 79 not 84
