# Supplementary material for: The effectiveness of health care provider physical activity recommendations in cancer survivors: a systematic review and meta-analysis protocol
Source: Springer Nature journal article supplement (doi:10.1186/s13643-017-0453-3), 2017-03-27
Supplement: MOESM3 [file 12180070]

### Additional file 3: Data extraction form

|                                |                      |                    |
|--------------------------------|----------------------|--------------------|
| Study identification:          | Date form completed: |                    |
| First author:                  | Year of study:       | Name of extractor: |
| Full citation (including doi): |                      |                    |

#### GENERAL INFORMATION

|                                                                                                                                               |
|-----------------------------------------------------------------------------------------------------------------------------------------------|
| Publication type: <input type="checkbox"/> Journal article <input type="checkbox"/> Abstract <input type="checkbox"/> Other (specify: _____)  |
| Country of study:                                                                                                                             |
| Funding source of study:                                                                                                                      |
| Potential conflict of interest from funding source? <input type="checkbox"/> Yes <input type="checkbox"/> No <input type="checkbox"/> Unclear |

#### STUDY ELIGIBILITY

| <b>Study characteristics</b>                                                                                                                                                                                                                                                                                                                                                                                                                                                                                                                                                                                                                                 | <b>Page/<br/>Para/<br/>Fig #</b>                                                                                                                              |                                                                                                                                                               |                                                        |                                                                                                            |                      |  |  |
|--------------------------------------------------------------------------------------------------------------------------------------------------------------------------------------------------------------------------------------------------------------------------------------------------------------------------------------------------------------------------------------------------------------------------------------------------------------------------------------------------------------------------------------------------------------------------------------------------------------------------------------------------------------|---------------------------------------------------------------------------------------------------------------------------------------------------------------|---------------------------------------------------------------------------------------------------------------------------------------------------------------|--------------------------------------------------------|------------------------------------------------------------------------------------------------------------|----------------------|--|--|
| <table border="1" style="width: 100%; border-collapse: collapse;"> <tr> <td style="width: 20%; vertical-align: top;">Type of study</td> <td> <input type="checkbox"/> Randomized controlled trial<br/> <input type="checkbox"/> Controlled clinical trial<br/> <input type="checkbox"/> Other (specify: _____)                 </td> </tr> <tr> <td style="vertical-align: top;">Does the study design meet the criteria for inclusion?</td> <td> <input type="checkbox"/> Yes    <input type="checkbox"/> No → <b>Exclude</b>    <input type="checkbox"/> Unclear                 </td> </tr> <tr> <td colspan="2">Description in text:</td> </tr> </table> | Type of study                                                                                                                                                 | <input type="checkbox"/> Randomized controlled trial<br><input type="checkbox"/> Controlled clinical trial<br><input type="checkbox"/> Other (specify: _____) | Does the study design meet the criteria for inclusion? | <input type="checkbox"/> Yes <input type="checkbox"/> No → <b>Exclude</b> <input type="checkbox"/> Unclear | Description in text: |  |  |
| Type of study                                                                                                                                                                                                                                                                                                                                                                                                                                                                                                                                                                                                                                                | <input type="checkbox"/> Randomized controlled trial<br><input type="checkbox"/> Controlled clinical trial<br><input type="checkbox"/> Other (specify: _____) |                                                                                                                                                               |                                                        |                                                                                                            |                      |  |  |
| Does the study design meet the criteria for inclusion?                                                                                                                                                                                                                                                                                                                                                                                                                                                                                                                                                                                                       | <input type="checkbox"/> Yes <input type="checkbox"/> No → <b>Exclude</b> <input type="checkbox"/> Unclear                                                    |                                                                                                                                                               |                                                        |                                                                                                            |                      |  |  |
| Description in text:                                                                                                                                                                                                                                                                                                                                                                                                                                                                                                                                                                                                                                         |                                                                                                                                                               |                                                                                                                                                               |                                                        |                                                                                                            |                      |  |  |
| <table border="1" style="width: 100%; border-collapse: collapse;"> <tr> <td style="width: 20%; vertical-align: top;">Participants</td> <td>Describe the participants:</td> </tr> <tr> <td style="vertical-align: top;">Do the participants meet the criteria for inclusion?</td> <td> <input type="checkbox"/> Yes    <input type="checkbox"/> No → <b>Exclude</b>    <input type="checkbox"/> Unclear                 </td> </tr> <tr> <td colspan="2">Description in text:</td> </tr> </table>                                                                                                                                                             | Participants                                                                                                                                                  | Describe the participants:                                                                                                                                    | Do the participants meet the criteria for inclusion?   | <input type="checkbox"/> Yes <input type="checkbox"/> No → <b>Exclude</b> <input type="checkbox"/> Unclear | Description in text: |  |  |
| Participants                                                                                                                                                                                                                                                                                                                                                                                                                                                                                                                                                                                                                                                 | Describe the participants:                                                                                                                                    |                                                                                                                                                               |                                                        |                                                                                                            |                      |  |  |
| Do the participants meet the criteria for inclusion?                                                                                                                                                                                                                                                                                                                                                                                                                                                                                                                                                                                                         | <input type="checkbox"/> Yes <input type="checkbox"/> No → <b>Exclude</b> <input type="checkbox"/> Unclear                                                    |                                                                                                                                                               |                                                        |                                                                                                            |                      |  |  |
| Description in text:                                                                                                                                                                                                                                                                                                                                                                                                                                                                                                                                                                                                                                         |                                                                                                                                                               |                                                                                                                                                               |                                                        |                                                                                                            |                      |  |  |

**STUDY ELIGIBILITY (CONTINUED)**

|                                |                                                                           |                                                                                                            |  |
|--------------------------------|---------------------------------------------------------------------------|------------------------------------------------------------------------------------------------------------|--|
| Type(s) of intervention(s)     | Describe the intervention(s):                                             |                                                                                                            |  |
|                                | Does/do the intervention(s) meet the criteria for inclusion?              | <input type="checkbox"/> Yes <input type="checkbox"/> No → <b>Exclude</b> <input type="checkbox"/> Unclear |  |
|                                | Description in text:                                                      |                                                                                                            |  |
| Type(s) of outcome(s) assessed | Describe the physical activity outcome(s) assessed:                       |                                                                                                            |  |
|                                | Does/do the physical activity outcome(s) meet the criteria for inclusion? | <input type="checkbox"/> Yes <input type="checkbox"/> No → <b>Exclude</b> <input type="checkbox"/> Unclear |  |
|                                | Description in text:                                                      |                                                                                                            |  |
|                                | Were additional outcomes assessed?                                        | <input type="checkbox"/> Yes <input type="checkbox"/> No → <b>Exclude</b> <input type="checkbox"/> Unclear |  |
|                                | If yes, what additional outcome(s) was/were assessed?                     |                                                                                                            |  |
|                                | Description in text:                                                      |                                                                                                            |  |

**SUMMARY OF ASSESSMENT FOR INCLUSION**

|                                                                                                                          |                                                                                    |
|--------------------------------------------------------------------------------------------------------------------------|------------------------------------------------------------------------------------|
| <input type="checkbox"/> Include in review <input type="checkbox"/> Exclude from review <input type="checkbox"/> Unclear |                                                                                    |
| Independently assessed and then compared?<br><input type="checkbox"/> Yes <input type="checkbox"/> No                    | Disagreement resolved?<br><input type="checkbox"/> Yes <input type="checkbox"/> No |
| Request further details?<br><input type="checkbox"/> Yes <input type="checkbox"/> No                                     | Contact details of corresponding authors:                                          |
| Notes:                                                                                                                   |                                                                                    |

**DO NOT PROCEED IF PAPER EXCLUDED FROM REVIEW**

## STUDY DETAILS

| Study intention        | Descriptions as stated in the report/paper                                  | Page/<br>Para/<br>Fig # |
|------------------------|-----------------------------------------------------------------------------|-------------------------|
| Aim of intervention(s) | What was the problem that the intervention(s) was/were designed to address? |                         |
| Aim(s) of study        | What was the study designed to assess? Is/are the aim clearly stated?       |                         |
| Total study duration   |                                                                             |                         |
| Notes:                 |                                                                             |                         |

| Methods                                                                                                                                                                                                             | Descriptions as stated in the report/paper                                                                | Page/<br>Para/<br>Fig # |
|---------------------------------------------------------------------------------------------------------------------------------------------------------------------------------------------------------------------|-----------------------------------------------------------------------------------------------------------|-------------------------|
| Method(s) of recruitment of participants<br><i>(How were potential participants approached and invited to participate? Where were participants recruited from? Does this differ from the intervention setting?)</i> |                                                                                                           |                         |
| Inclusion/exclusion criteria for participation in study                                                                                                                                                             | Inclusion:<br><br>Exclusion:                                                                              |                         |
| Representativeness of sample:<br>Are participants in the study likely to be representative of the target population?                                                                                                | <input type="checkbox"/> Yes <input type="checkbox"/> No <input type="checkbox"/> Unclear<br>Details:     |                         |
| Total number of intervention groups                                                                                                                                                                                 |                                                                                                           |                         |
| Sample size calculation:<br>What assumptions were made?<br>Were these assumptions appropriate?                                                                                                                      | Assumptions:<br><input type="checkbox"/> Yes <input type="checkbox"/> No <input type="checkbox"/> Unclear |                         |
| What was the unit of randomization (if applicable)?<br>Was allocation by individuals or cluster/groups?                                                                                                             | Unit:<br><br><input type="checkbox"/> Yes <input type="checkbox"/> No <input type="checkbox"/> Unclear    |                         |
| What was the unit of analysis?<br>Is this the same as the unit of randomization?                                                                                                                                    | Unit:<br><br><input type="checkbox"/> Yes <input type="checkbox"/> No <input type="checkbox"/> Unclear    |                         |
| Statistical method(s) used and appropriateness of these methods                                                                                                                                                     |                                                                                                           |                         |
| Notes:                                                                                                                                                                                                              |                                                                                                           |                         |

| <b>Participants</b>                                                                                                                                                                                                                                  | <b>Include information for each group (i.e., intervention(s) and control(s)) under study</b>          | <b>Page/<br/>Para/<br/>Fig #</b> |
|------------------------------------------------------------------------------------------------------------------------------------------------------------------------------------------------------------------------------------------------------|-------------------------------------------------------------------------------------------------------|----------------------------------|
| What percentage of selected individuals agreed to participate?                                                                                                                                                                                       |                                                                                                       |                                  |
| Total number randomized (or total population at start of study for controlled clinical trials)                                                                                                                                                       |                                                                                                       |                                  |
| Number of individuals allocated to each group                                                                                                                                                                                                        |                                                                                                       |                                  |
| Where there any significant baseline imbalances?                                                                                                                                                                                                     | <input type="checkbox"/> Yes <input type="checkbox"/> No <input type="checkbox"/> Unclear<br>Details: |                                  |
| Number and reason for withdrawals and exclusions for each group                                                                                                                                                                                      |                                                                                                       |                                  |
| What percentage of participants completed the study?                                                                                                                                                                                                 |                                                                                                       |                                  |
| What percentage of participants received the allocated intervention(s)?                                                                                                                                                                              |                                                                                                       |                                  |
| Is the analysis performed by intervention(s) allocation status (intention-to-treat) rather than the actual intervention received?<br>Have any attempts been made to impute missing data? If imputation was used, what imputation method(s) was used? |                                                                                                       |                                  |
| Age (median, mean, range, and variance, if possible)                                                                                                                                                                                                 | Median:            Mean:            Range:<br>Standard deviation (or other variance):                 |                                  |
| Sex                                                                                                                                                                                                                                                  | <input type="checkbox"/> Male (n=    ) <input type="checkbox"/> Female (n=    )                       |                                  |
| Race/Ethnicity                                                                                                                                                                                                                                       |                                                                                                       |                                  |
| Principal health problem (include type of cancer, stage of disease, and treatment status if possible)                                                                                                                                                |                                                                                                       |                                  |

|                               |  |  |
|-------------------------------|--|--|
| Comorbid health condition(s)? |  |  |
| Notes:                        |  |  |

| <b>Intervention group 1</b> ( <i>copy and paste table if multiple intervention groups</i> )            |                                                                                                                                 | <b>Page/<br/>Para/<br/>Fig #</b> |
|--------------------------------------------------------------------------------------------------------|---------------------------------------------------------------------------------------------------------------------------------|----------------------------------|
| Specify setting (e.g., multi-centre, community clinic, GP clinic)                                      |                                                                                                                                 |                                  |
| Theoretical framework                                                                                  | <input type="checkbox"/> Yes <input type="checkbox"/> No <input type="checkbox"/> Unclear<br>Describe (provide key references): |                                  |
| Content (list the strategies intended and delivered)                                                   | Details:                                                                                                                        |                                  |
| Delivery (e.g., timing, frequency, duration, intensity, fidelity)                                      |                                                                                                                                 |                                  |
| Providers (e.g., who, number, profession, training)                                                    |                                                                                                                                 |                                  |
| Follow-up assessments?                                                                                 | <input type="checkbox"/> Yes <input type="checkbox"/> No <input type="checkbox"/> Unclear<br>If yes, duration:                  |                                  |
| What are the moderators/mediators of changes stated in the study?                                      |                                                                                                                                 |                                  |
| Control/comparison (what information is provided about what the control or comparison group received?) | Details:                                                                                                                        |                                  |
| Notes:                                                                                                 |                                                                                                                                 |                                  |

**OUTCOMES**

|                                                                                                        | <b>Outcome 1</b>                                                                          | <b>Page/ Para/<br/>Fig #</b> |
|--------------------------------------------------------------------------------------------------------|-------------------------------------------------------------------------------------------|------------------------------|
| Outcome name and definition                                                                            |                                                                                           |                              |
| Time points measured                                                                                   |                                                                                           |                              |
| Time points reported                                                                                   |                                                                                           |                              |
| How is the measure applied? (e.g., telephone survey, mail survey, in person, routinely collected data) |                                                                                           |                              |
| How is the outcome assessed?                                                                           | <input type="checkbox"/> Self-reported <input type="checkbox"/> Objective<br>Describe:    |                              |
| Unit of measurement (if relevant)                                                                      |                                                                                           |                              |
| Has the outcome measure validated?                                                                     | <input type="checkbox"/> Yes <input type="checkbox"/> No <input type="checkbox"/> Unclear |                              |
| Is the outcome measure reliable?                                                                       | <input type="checkbox"/> Yes <input type="checkbox"/> No <input type="checkbox"/> Unclear |                              |
| Notes:                                                                                                 |                                                                                           |                              |

| <i>(copy and paste table if multiple intervention groups)</i>                                          | <b>Outcome 2...k</b>                                                                      | <b>Page/ Para/<br/>Fig #</b> |
|--------------------------------------------------------------------------------------------------------|-------------------------------------------------------------------------------------------|------------------------------|
| Outcome name and definition                                                                            |                                                                                           |                              |
| Time points measured                                                                                   |                                                                                           |                              |
| Time points reported                                                                                   |                                                                                           |                              |
| How is the measure applied? (e.g., telephone survey, mail survey, in person, routinely collected data) |                                                                                           |                              |
| How is the outcome assessed?                                                                           | <input type="checkbox"/> Self-reported <input type="checkbox"/> Objective<br>Describe:    |                              |
| Unit of measurement (if relevant)                                                                      |                                                                                           |                              |
| Has the outcome measure validated?                                                                     | <input type="checkbox"/> Yes <input type="checkbox"/> No <input type="checkbox"/> Unclear |                              |
| Is the outcome measure reliable?                                                                       | <input type="checkbox"/> Yes <input type="checkbox"/> No <input type="checkbox"/> Unclear |                              |
| Notes:                                                                                                 |                                                                                           |                              |

## RESULTS

|                                                         | For continuous outcomes                                                                               |                              |                           |                 |                              |                           | Page/<br>Para/<br>Fig # |
|---------------------------------------------------------|-------------------------------------------------------------------------------------------------------|------------------------------|---------------------------|-----------------|------------------------------|---------------------------|-------------------------|
| Description<br>(as reported<br>in text)                 |                                                                                                       |                              |                           |                 |                              |                           |                         |
| Comparison                                              |                                                                                                       |                              |                           |                 |                              |                           |                         |
| Outcome(s)                                              |                                                                                                       |                              |                           |                 |                              |                           |                         |
| Subgroups                                               |                                                                                                       |                              |                           |                 |                              |                           |                         |
| Time points                                             |                                                                                                       |                              |                           |                 |                              |                           |                         |
| Post-<br>intervention<br>or change<br>from<br>baseline? |                                                                                                       |                              |                           |                 |                              |                           |                         |
| Results                                                 | Intervention                                                                                          |                              |                           | Comparison      |                              |                           |                         |
|                                                         | Mean/<br>Median                                                                                       | SD (or<br>other<br>variance) | Number of<br>participants | Mean/<br>Median | SD (or<br>other<br>variance) | Number of<br>participants |                         |
|                                                         |                                                                                                       |                              |                           |                 |                              |                           |                         |
| Any other<br>results<br>reported                        |                                                                                                       |                              |                           |                 |                              |                           |                         |
| Number of<br>missing<br>participants<br>and reasons     |                                                                                                       |                              |                           |                 |                              |                           |                         |
| Re-analysis<br>required?                                | <input type="checkbox"/> Yes <input type="checkbox"/> No <input type="checkbox"/> Unclear<br>Reasons: |                              |                           |                 |                              |                           |                         |
| Re-analysis<br>possible?                                | <input type="checkbox"/> Yes <input type="checkbox"/> No <input type="checkbox"/> Unclear<br>Reasons: |                              |                           |                 |                              |                           |                         |
| Re-<br>analyzed<br>results                              |                                                                                                       |                              |                           |                 |                              |                           |                         |
| Notes:                                                  |                                                                                                       |                              |                           |                 |                              |                           |                         |

|                                                         | <b>For dichotomous or categorical outcomes</b>                                                        |                              |                           |                    |                              |                           | <b>Page/<br/>Para/<br/>Fig #</b> |
|---------------------------------------------------------|-------------------------------------------------------------------------------------------------------|------------------------------|---------------------------|--------------------|------------------------------|---------------------------|----------------------------------|
| Description<br>(as reported<br>in text)                 |                                                                                                       |                              |                           |                    |                              |                           |                                  |
| Comparison                                              |                                                                                                       |                              |                           |                    |                              |                           |                                  |
| Outcome(s)                                              |                                                                                                       |                              |                           |                    |                              |                           |                                  |
| Subgroups                                               |                                                                                                       |                              |                           |                    |                              |                           |                                  |
| Time points                                             |                                                                                                       |                              |                           |                    |                              |                           |                                  |
| Post-<br>intervention<br>or change<br>from<br>baseline? |                                                                                                       |                              |                           |                    |                              |                           |                                  |
| Results                                                 | Intervention                                                                                          |                              |                           | Comparison         |                              |                           |                                  |
|                                                         | Effect<br>estimate                                                                                    | CI (or<br>other<br>variance) | Number of<br>participants | Effect<br>estimate | CI (or<br>other<br>variance) | Number of<br>participants |                                  |
|                                                         |                                                                                                       |                              |                           |                    |                              |                           |                                  |
| Any other<br>results<br>reported                        |                                                                                                       |                              |                           |                    |                              |                           |                                  |
| Number of<br>missing<br>participants<br>and reasons     |                                                                                                       |                              |                           |                    |                              |                           |                                  |
| Re-analysis<br>required?                                | <input type="checkbox"/> Yes <input type="checkbox"/> No <input type="checkbox"/> Unclear<br>Reasons: |                              |                           |                    |                              |                           |                                  |
| Re-analysis<br>possible?                                | <input type="checkbox"/> Yes <input type="checkbox"/> No <input type="checkbox"/> Unclear<br>Reasons: |                              |                           |                    |                              |                           |                                  |
| Re-<br>analyzed<br>results                              |                                                                                                       |                              |                           |                    |                              |                           |                                  |
| Notes:                                                  |                                                                                                       |                              |                           |                    |                              |                           |                                  |

**OTHER RELEVANT INFORMATION**

|                                                                                                                                       |  |
|---------------------------------------------------------------------------------------------------------------------------------------|--|
| Were outcomes relating to harms/adverse events of the intervention described? Include any data for these in the outcomes tables above |  |
| Key conclusions of the study authors                                                                                                  |  |
| Could the inclusion of this study potentially bias the generalizability of the review?                                                |  |

**ATTACH CHECKLIST FOR ASSESSING RISK OF BIAS**
